# Supplementary material for: Three Generic Policies for Sustained Market Growth Based on Two Interdependent Organizational Resources—A Simulation Study and Implications
Source: MDPI journal article supplement (doi:10.3390/systems9020043), 2021-06-11
Supplement: s1 [file s1]

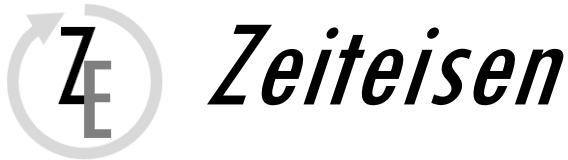

## Key facts

- *Price: € 431 per watch*
- *Desired delivery delay: 2 weeks*
- *Percentage of successful sales calls with a delivery delay of 2 weeks: 90%.*
- *Salesperson productivity: 9 new orders per week (90% of 10)*
- *Salesforce: 40 individuals*
- *Monthly salary per salesperson: € 3.000 gross*
- *Percentage of sales revenue for salesforce salaries: 25%.*
- *Delay for hiring new salespeople: 1 - 4 weeks (depending on the growth rate)*
- *Maximum weekly production capacity initially: 1,512 watches*
- *Shifts per week: 5, 6, 7, 10, 12, 14, 15, 18 or 21*

Shifts, capacity utilization, possible production and labor costs

| <i>Shifts per day</i> | <i>Labor days per week</i> | <i>Shifts per week</i> | <i>Capacity utilization fraction</i> | <i>Production</i> | <i>Cost coefficient</i> | <i>Extra shift multiplier</i> | <i>Salary costs per unit</i> |
|-----------------------|----------------------------|------------------------|--------------------------------------|-------------------|-------------------------|-------------------------------|------------------------------|
| 1                     | 5                          | 5                      | 0.238095238                          | 360               | 5.00                    | 1.000                         | 140.00                       |
| 2                     | 5                          | 10                     | 0.285714286                          | 432               | 6.25                    | 1.042                         | 145.83                       |
| 3                     | 5                          | 15                     | 0.333333333                          | 504               | 7.75                    | 1.107                         | 155.00                       |
| 1                     | 6                          | 6                      | 0.476190476                          | 720               | 11.25                   | 1.125                         | 157.50                       |
| 2                     | 6                          | 12                     | 0.571428571                          | 864               | 14.00                   | 1.167                         | 163.33                       |
| 3                     | 6                          | 18                     | 0.666666667                          | 1.008             | 17.25                   | 1.232                         | 172.50                       |
| 1                     | 7                          | 7                      | 0.714285714                          | 1.080             | 18.75                   | 1.250                         | 175.00                       |
| 2                     | 7                          | 14                     | 0.857142857                          | 1.296             | 23.25                   | 1.292                         | 180.83                       |
| 3                     | 7                          | 21                     | 1.000000000                          | 1.512             | 28.50                   | 1.357                         | 190.00                       |

- *Initial production configuration: 5 shifts, capacity utilization 0.238095238, possible production 360 and unit labor cost 140.*
- *Open orders initially: 720*
- *Delivery delay: Open orders / possible production =  $729/369 = 2$ .*
- *Acquisition cost for production capacity: € 20.000 per watches/week*
- *Lifetime of equipment: 8 years = 416 watches = € 48,07 per watch*
- *Production cost per watch: € 200 for 5 shifts (of which 140 labor costs) to € 250 for 21 shifts (of which € 190 labor costs)*
- *Delay for commissioning additional production capacity: 8 weeks*
